# Supplementary material for: De Novo Design of the ArsR Regulated Pars Promoter Enables a Highly Sensitive Whole-Cell Biosensor for Arsenic Contamination
Source: PubMed Central journal article supplement (PMC9134189; doi:10.1021/acs.analchem.2c00055), 2022-05-10
Supplement: ac2c00055_si_001.pdf [file ac2c00055_si_001.pdf]

## Supporting Information

### ***De novo* design of the ArsR regulated $P_{ars}$ promoter enables a highly sensitive whole-cell biosensor for arsenic contamination**

Sheng-Yan Chen<sup>a</sup>, Yan Zhang<sup>a</sup>, Renjie Li<sup>a</sup>, Baojun Wang<sup>b, c, d\*</sup>, and Bang-Ce Ye<sup>a, e, f\*</sup>

<sup>a</sup>School of Chemistry and Chemical Engineering, Shihezi University, Shihezi 832003, China.

<sup>b</sup>College of Chemical and Biological Engineering & ZJU-Hangzhou Global Scientific and Technological Innovation Center, Zhejiang University, Hangzhou 311200, China.

<sup>c</sup>Research Center of Biological Computation, Zhejiang Laboratory, Hangzhou 311100, China.

<sup>d</sup>Centre for Synthetic and Systems Biology, School of Biological Sciences, University of Edinburgh, Edinburgh EH9 3FF, United Kingdom.

<sup>e</sup>Institute of Engineering Biology and Health, Collaborative Innovation Center of Yangtze River Delta Region Green Pharmaceuticals, College of Pharmaceutical Sciences, Zhejiang University of Technology, Hangzhou 310014, Zhejiang, China.

<sup>f</sup>Lab of Biosystem and Microanalysis, State Key Laboratory of Bioreactor Engineering, East China University of Science and Technology, Shanghai 200237, China.

\*Corresponding author: Bang-Ce Ye, E-mail: [bcye@ecust.edu.cn](mailto:bcye@ecust.edu.cn). Baojun Wang, E-mail: [baojun.wang@zju.edu.cn](mailto:baojun.wang@zju.edu.cn).

#### **Table of Contents**

|                                                                                                                                                  |    |
|--------------------------------------------------------------------------------------------------------------------------------------------------|----|
| Figure S1. Schematic diagram of the p-TT- $P_{J109}$ -r30 <i>arsR</i> plasmid construct .....                                                    | 2  |
| Figure S2. Schematic diagram of the p-TT- $P_{J109}$ -r30 <i>arsR</i> - $P_{arsXX}$ (named as $P_{J109}$ - $P_{arsXX}$ ) plasmid construct ..... | 2  |
| Figure S3. Validation of the effective length of the ArsR binding site .....                                                                     | 3  |
| Figure S4. Results showing ABS sequence alignment with the RNA polymerase binding site .....                                                     | 3  |
| Figure S5. Different fluorescent sensors showing linear response to arsenic .....                                                                | 3  |
| Figure S6. Sensor specificity and temperature effect on sensor performance.....                                                                  | 4  |
| Figure S7. Absorbance of diverse colorimetric sensors at 650 nm was monitored across various arsenic concentrations .....                        | 4  |
| Table S1. Primers used in this study .....                                                                                                       | 5  |
| Table S2. Sequences of the genetic constructs used in this study .....                                                                           | 6  |
| Table S3. Plasmid constructs used in this study.....                                                                                             | 6  |
| Table S4. RNAP binding site library contains eighteen –35 sites and thirty-six –10 sites.....                                                    | 10 |
| Table S5. Best fits for the characterized responses of the arsenic sensors with diverse promoters                                                | 11 |
| Table S6. Accuracy and reliability of the constructed biosensors for real samples .....                                                          | 11 |
| Table S7. Comparison of previously reported arsenic sensors with this study .....                                                                | 11 |
| References.....                                                                                                                                  | 12 |

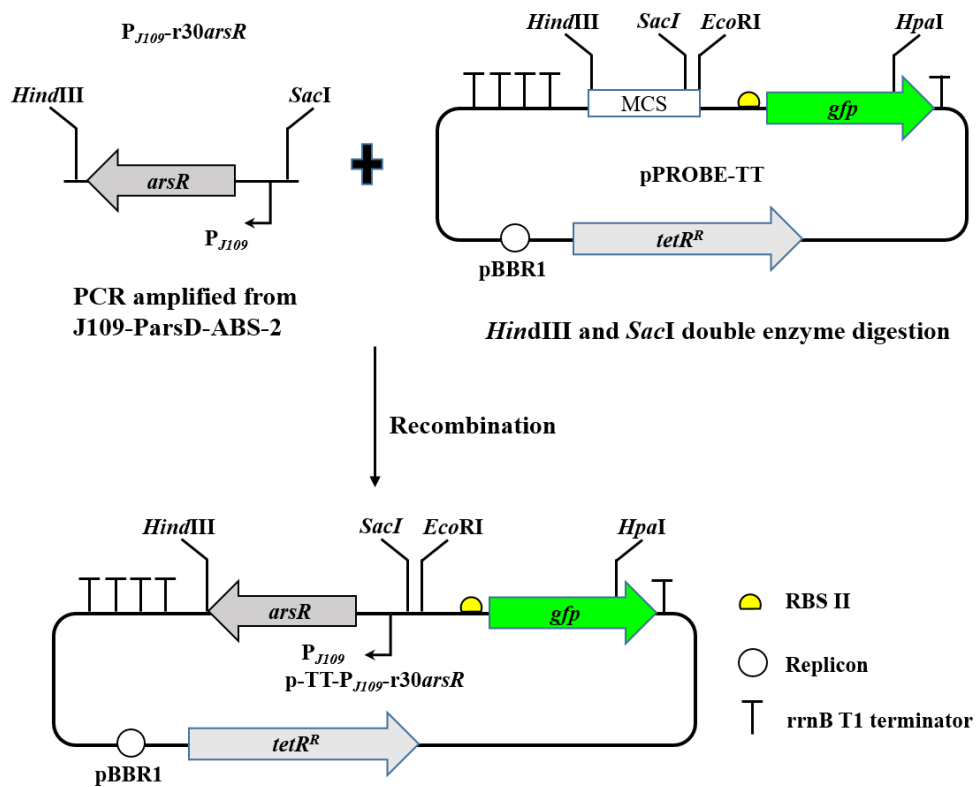

Figure S1. Schematic diagram of the p-TT- $P_{J109}$ -r30arsR plasmid construct.

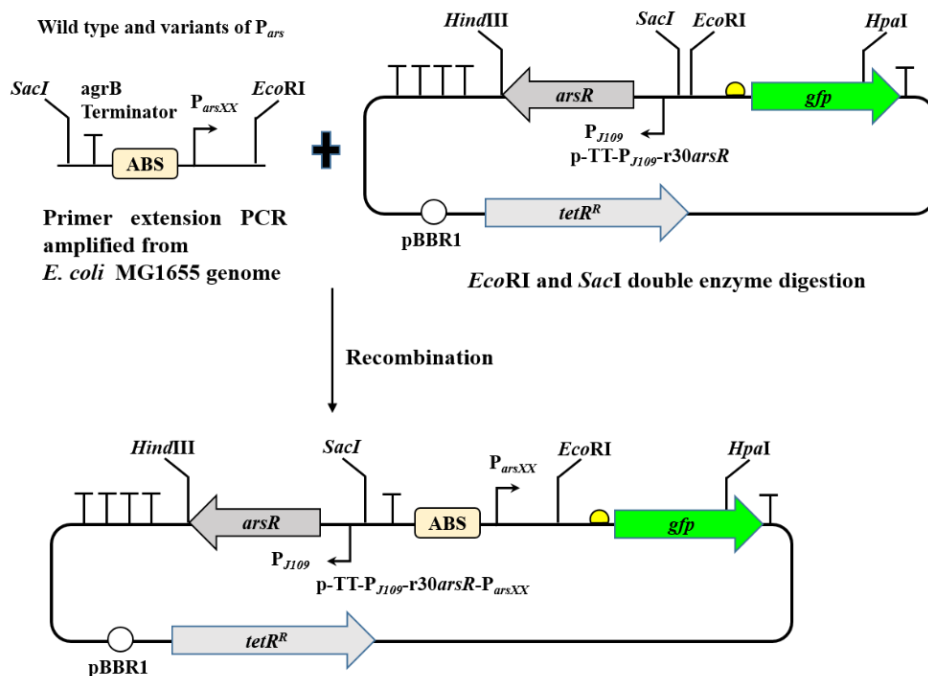

Figure S2. Schematic diagram of the p-TT- $P_{J109}$ -r30arsR- $P_{arsXX}$  (named as  $P_{J109}$ - $P_{arsXX}$ ) plasmid construct.

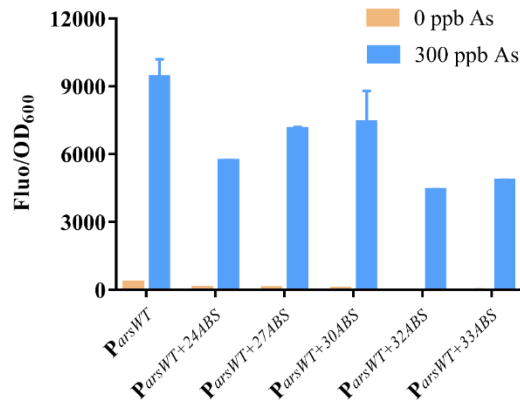

**Figure S3. Validation of the effective length of the ArsR binding site.**

The ABS of different lengths were added downstream of the wild-type promoter to test the leakage level of the sensor.

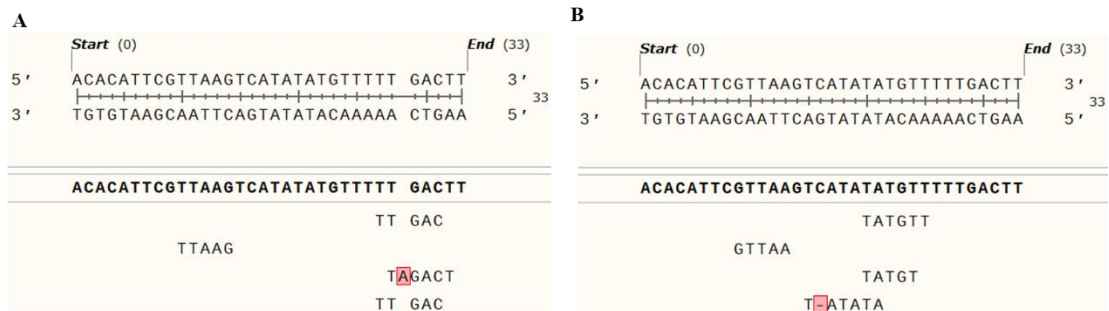

**Figure S4. Results showing ABS sequence alignment with the RNA polymerase binding site.**

(A) Alignment with the  $-35$  sites library allows the ABS sequence to generate new  $-35$  sites. (B) Alignment with the  $-10$  sites library allows the ABS sequence to generate new  $-10$  sites.

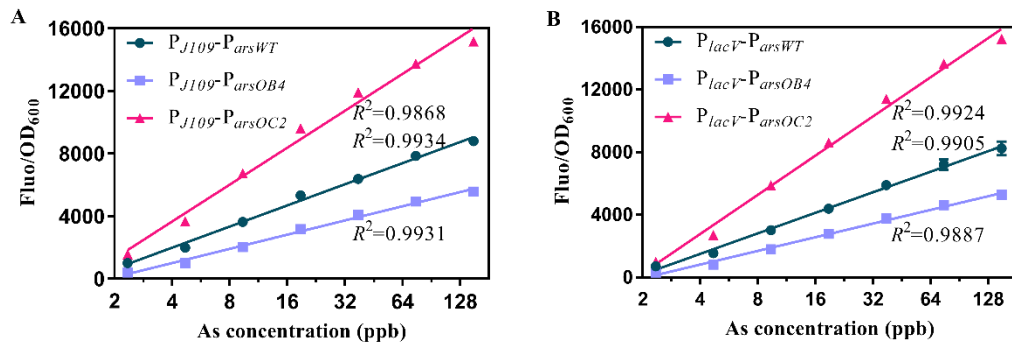

**Figure S5. Different fluorescent sensors showing linear response to arsenic.**

(A) Best-fit parameters for the P<sub>J109</sub>-P<sub>arsWT</sub>, P<sub>J109</sub>-P<sub>arsOB4</sub>, and P<sub>J109</sub>-P<sub>arsOC2</sub> biosensors in the 2.34 to 150 ppb arsenic concentration. (B) Best-fit parameters for the P<sub>lacV</sub>-P<sub>arsWT</sub>, P<sub>lacV</sub>-P<sub>arsOB4</sub>, and P<sub>lacV</sub>-P<sub>arsOC2</sub> biosensors in the 2.34 to 150 ppb arsenic concentration. The data from Figure 3.A and C, the error bars are smaller than the data symbols (n = 3).

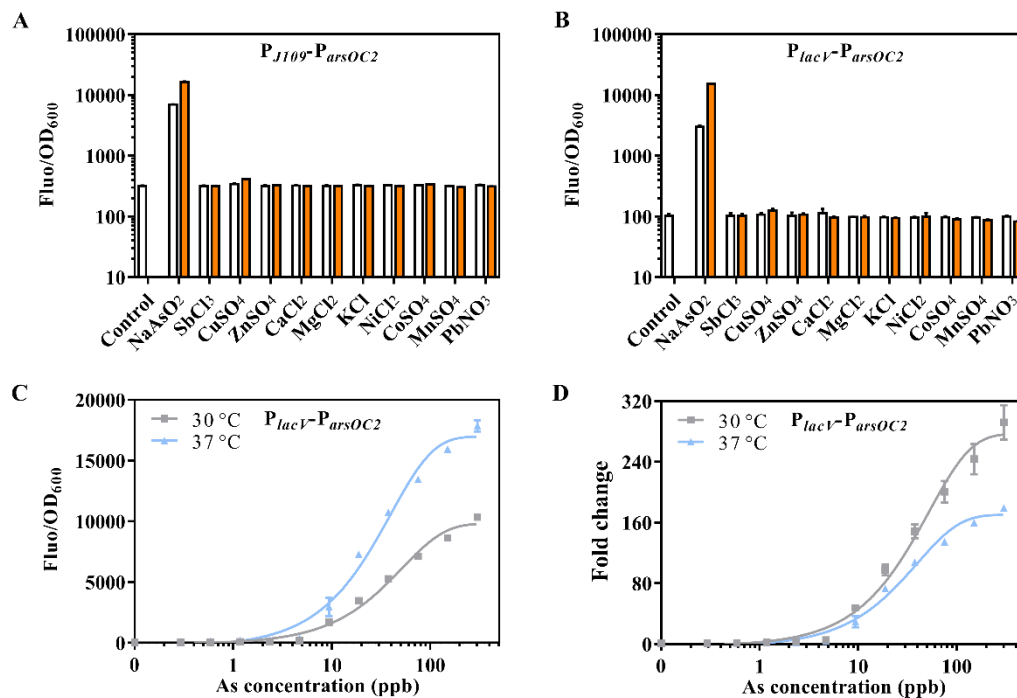

**Figure S6. Sensor specificity and temperature effect on sensor performance.**

(A-B) Characterization of the specificity of the  $P_{J109}\text{-}P_{arsOC2}$  and  $P_{lacV}\text{-}P_{arsOC2}$  sensor, for arsenic and antimony, the induced final concentrations were 0.1  $\mu\text{M}$  (7.5 ppb for As) and 1  $\mu\text{M}$  (75 ppb for As); for all other compounds, the induced concentrations were 10  $\mu\text{M}$  and 100  $\mu\text{M}$ . (C-D) The dose-response and fold change of the  $P_{lacV}\text{-}P_{arsOC2}$  sensor to different concentrations of arsenic at 30 °C and 37 °C. Error bars show the standard deviation ( $n = 3$ ).

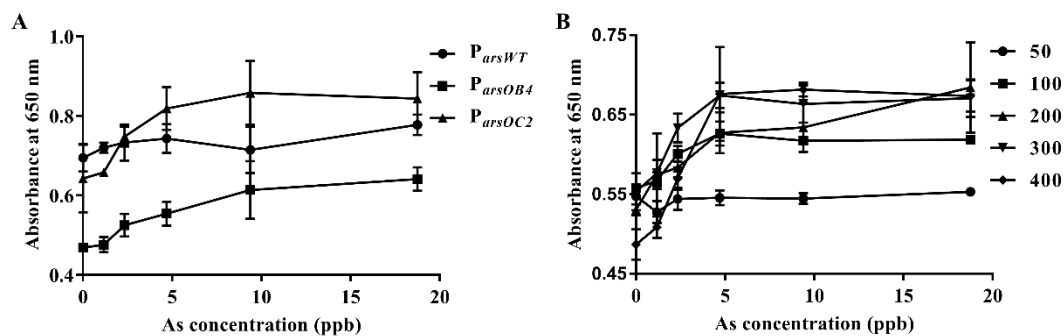

**Figure S7. Absorbance of diverse colorimetric sensors at 650 nm was monitored across various arsenic concentrations.**

(A) OD<sub>650</sub> of cell cultures with different colorimetric sensors at various concentrations of arsenic (X-gal = 200  $\mu\text{g/mL}$ ). (B) OD<sub>650</sub> of the  $P_{lacV}\text{-}P_{arsOB4}\text{-}lacZ$  sensor at different X-gal substrate concentrations. Error bars show the standard deviation ( $n = 3$ ).

**Table S1. Primers used in this study**

| Primer name     | Sequence                                                                   |
|-----------------|----------------------------------------------------------------------------|
| HR-EcoRI-Pars-R | gtagtagggaataagcc <u>gaattc</u> TTGTTGCAGGTAGTGTCTCTCTTCG                  |
| arsO-R1         | AGGAAGGTAATAGGTGTGAATTTTG                                                  |
| arsO-R3         | ggaataagcc <u>gaattc</u> TTCGAAGCGGATAAGTCAAAAACATATATGACTTAACGAATGT       |
| arsOA1-R2       | AAAACATATATGACTTAACGAATGTGTAAATGCAGAGGAAGGTAATAGGTGTGAATTTTG               |
| arsOB1-R2       | AAAACATATATGACTTAACGAATGTTGTAAAGCAGAGGAAGGTAATAGGTGTGAATTTTG               |
| arsOB2-R2       | AAAACATATATGACTTAACGAATGTGGTAAAGCAGAGGAAGGTAATAGGTGTGAATTTTG               |
| arsOB3-R2       | AAAACATATATGACTTAACGAATGTGTAAAGCAGAGGAAGGTAATAGGTGTGAATTTTG                |
| arsOB4-R2       | AAAACATATATGACTTAACGAATGTGTACAAGCAGAGGAAGGTAATAGGTGTGAATTTTG               |
| arsOB5-R2       | AAAACATATATGACTTAACGAATGTGTAAAAGCAGAGGAAGGTAATAGGTGTGAATTTTG               |
| arsOC1-R2       | AAAACATATATGACTTAACGAATGTGTGTAAACAGAGGAAGGTAATAGGTGTGAATTTTG               |
| arsOC2-R2       | AAAACATATATGACTTAACGAATGTGTGTCAACAGAGGAAGGTAATAGGTGTGAATTTTG               |
| arsOC3-R2       | AAAACATATATGACTTAACGAATGTGAGTCAACAGAGGAAGGTAATAGGTGTGAATTTTG               |
| arsOD1-R2       | AAAACATATATGACTTAACGAATGTGTTGTAAAAGAGGAAGGTAATAGGTGTGAATTTTG               |
| arsOE1-R2       | AAAACATATATGACTTAACGAATGTGTATGTAAAGAGGAAGGTAATAGGTGTGAATTTTG               |
| arsOE2-R2       | AAAACATATATGACTTAACGAATGTGTATGTCAAGAGGAAGGTAATAGGTGTGAATTTTG               |
| arsOF1-R2       | AAAACATATATGACTTAACGAATGTGTAATGTAAAAGGAAGGTAATAGGTGTGAATTTTG               |
| arsOG1-R2       | AAAACATATATGACTTAACGAATGTGTAAGTGTAAAGGAAGGTAATAGGTGTGAATTTTG               |
| arsOH1-R2       | AAAACATATATGACTTAACGAATGTGTAAGTTGTAAAGAAGGTAATAGGTGTGAATTTTG               |
| ParsWT24arsO-R  | <u>CGAATTC</u> GCGGAAAGTCAAAAACATATATGACTTAATTGTTGCAGGTAGTGTCTCTCTTC       |
| ParsWT27arsO-R  | <u>CGAATTC</u> GCGGAAAGTCAAAAACATATATGACTTAACGATTGTTGCAGGTAGTGTCTCTCTTC    |
| ParsWT30arsO-R  | <u>CGAATTC</u> GCGGAAAGTCAAAAACATATATGACTTAACGAATGTTGTTGCAGGTAGTGTCTCTCTTC |

|                  |                                                                                     |
|------------------|-------------------------------------------------------------------------------------|
| ParsWT32arsO-R   | <u>CGAATTC</u> GCGGAAAGTCAAAAACATATATGACTTAACGAATGTGTTGTTGC<br>AGGTAGTGTCTCTCTTC    |
| ParsWT33arsO-R   | <u>CGAATTC</u> GCGGAAAGTCAAAAACATATATGACTTAACGAATGTGTTTGTGTTGC<br>AGGTAGTGTCTCTCTTC |
| (pTTsacI)J109-R  | gaataagcc <u>gaattcgagctc</u> TTTACAGCTAGCTCAGTCCTAGGGAC                            |
| (J109)Pars-F     | ctaggactgagctagctgtaaa <u>gagctc</u> AGCCACTGGCTAATAGTAT                            |
| (pTTsacI)PlacV-R | gaataagcc <u>gaattcgagctc</u> GCGCCCAATACGCAAACCG                                   |
| (lacVsacI)Pars-F | ggtttgcgtattggcg <u>gagctc</u> AGCCACTGGCTAATAGTATTGAGCTG                           |
| (pTTRBS)lacZ-F   | CTAACTAAAGATTAAC TTATAAGGAGGAAAAACATATGACCATGATTACGG<br>ATTCACTG                    |
| (Parswt)pTTRBS-F | tacctgcaaca <u>agaattc</u> GGCTTATCCCTAACTAACTAAAGATTAAC TTATAAGGAG<br>G            |
| (arsO)pTTRBS-F   | atccgctt <u>gaagaattc</u> GGCTTATCCCTAACTAACTAAAGATTAAC TTATAAGGAG<br>G             |
| (HRhapI)lacZ-R   | ttgtgtctaatttga <u>agttaac</u> TTATTATTTTTGACACCAGACCAACTG                          |
| pPROBE-TT-F      | GGAATTGGGGATCGGAAGCTT (sequencing primer)                                           |
| pPROBE-TT-R      | GCATCACCTTCACCCTCTCCAC (sequencing primer)                                          |

Note: The DNA sequence (lowercase) indicates the homologous recombination sequence on the plasmid. The underlined sequences are restriction endonuclease sites.

**Table S2. Sequences of the genetic constructs used in this study**

| Gene name                                           | Sequence and characteristic                                                                                                                                                                                                                                                                                                                                                                                                                                                                                             |
|-----------------------------------------------------|-------------------------------------------------------------------------------------------------------------------------------------------------------------------------------------------------------------------------------------------------------------------------------------------------------------------------------------------------------------------------------------------------------------------------------------------------------------------------------------------------------------------------|
| <i>P<sub>J109</sub></i> -RBS30                      | ( <i>Sac</i> I)TTTACAGCTAGCTCAGTCCTAGGGACTGTGCTAGCTACTAGAGATTAAAGAGGAG<br>AAATACTAG( <i>arsR</i> )<br>RBS30: ATTAAAGAGGAGAAATACTAG                                                                                                                                                                                                                                                                                                                                                                                      |
| <i>P<sub>lacV</sub></i> -RBS <sub><i>arsR</i></sub> | ( <i>Sac</i> I)ACGCAAACCGCCTCTCCCCGCGCGTTGGCCGATTCATTAATGCAGCTGGCAGCAGAC<br>AGGTTTCCCGACTGGAAAGCGGGCAGTGAGCGCAACGCAATTAATGTGAGTTAGCTCA<br>CTCATTAGGCACCCAGGCTTT <b>ACG</b> TTGTGAGCGCTCACAAAT <b>TATAGT</b> GTGTGGAATCA<br>ATCAGGAGCGCAAT ( <i>arsR</i> )<br>RBS <sub><i>arsR</i></sub> : CAATCAGGAGCGCAAT                                                                                                                                                                                                              |
| <i>arsR</i>                                         | ( <i>P<sub>J109</sub></i> -RBS30 or <i>P<sub>lacV</sub></i> -RBS <sub><i>arsR</i></sub> )<br><b>ATG</b> TCATTCTGTTACCCATCCAATTGTTCAAATTCTTGCTGATGAAACCCGTCTGGGC<br>ATCGTTTTACTGCTCAGCGAACTGGGAGAGTTATGCGTCTGCGATCTCTGCACTGCTCT<br>CGACCAGTCGCAGCCCAAGATCTCCCGCCACCTGGCATTGCTGCGTGAAAGCGGGCTA<br>TTGCTGGACCGCAAGCAAGGTAAGTGGGTTTATTACCGCTTATCACCGCATATTCCAGC<br>ATGGGCGGCGAAAATTATTGATGAGGCCTGGCGATGTGAACAGGAAAAGGTTTCAGGCG<br>ATTGTCCGCAACCTGGCTCGACAAAAGTGTCCGGGGACAGTAAGAACATTTGCAGTT<br><b>AA</b> ( <i>Hind</i> III) |

|                                                                                   |                                                                                                                                                                                                                                                                                                                                                                                                                                                                                                                                                                                                                                                                                                                                                                                                                                                                                                                                                                                                                                                                                                                                                                                                                                                                                                                                                                                                                                                                                                         |
|-----------------------------------------------------------------------------------|---------------------------------------------------------------------------------------------------------------------------------------------------------------------------------------------------------------------------------------------------------------------------------------------------------------------------------------------------------------------------------------------------------------------------------------------------------------------------------------------------------------------------------------------------------------------------------------------------------------------------------------------------------------------------------------------------------------------------------------------------------------------------------------------------------------------------------------------------------------------------------------------------------------------------------------------------------------------------------------------------------------------------------------------------------------------------------------------------------------------------------------------------------------------------------------------------------------------------------------------------------------------------------------------------------------------------------------------------------------------------------------------------------------------------------------------------------------------------------------------------------|
| <p><i>ParsWT</i> promoter</p>                                                     | <p>(<i>SacI</i>)AGCCACTGGCTAATAGTATTGAGCTGTTAGATAAGAACTCTCTCACTCCAGCCAG<br/> AGCCACCAACTCAGGGCTGGAAAGTAAAAAACCAGCGCAAAGTCGGTTTTTTTTTACG<br/> <b>TCCTGATT</b>CAGACCTCCTTTCAAATGAATAGCCAACTCAAATTCACACCTATTACCTT<br/> CCTCTGCACTT<u>ACACATTCGTTAAGTCATATATGTTT<b>TTGACT</b></u>TATCCGCTTCGAAGAG<br/> AGACACTACCTGCAACAA (<i>EcoRI</i>)<br/> agrB Terminator: <b>AAAAAACCAGCGCAAAGTCGGTTTTTTTTTACGTCCTGA</b><sup>1</sup><br/> ArsR Binding site: <u>ACACATTCGTTAAGTCATATATGTTT<b>TTGACT</b></u><sup>2</sup><br/> -35 site: <b>TTGACT</b><br/> -10 site: <b>GACACT</b></p>                                                                                                                                                                                                                                                                                                                                                                                                                                                                                                                                                                                                                                                                                                                                                                                                                                                                                                                                  |
| <p><i>gfp</i> gene<br/>(pPROBE-TT<br/>carrying a <i>gfp</i>)</p>                  | <p>(<i>EcoRI</i>)ggcttattccctaactaactaaagattaactttataaggaggaaaaacat<b>ATG</b>AGTAAAGGAGAAGAACTTTT<br/> CACTGGAGTTGTCCCAATTCTTGTGAATTAGATGGTGATGTTAATGGGCACAAATTTTC<br/> TGTCAGTGGAGAGGGTGAAGGTGATGCAACATACGGAAAACCTTACCCTTAAATTTATTT<br/> GCACTACTGGAAAACCTACCTGTTCCATGGCCAACACTTGTCACTACTTTGACTTATGGT<br/> GTTCAATGCTTTTCAAGATACCCAGATCATATGAAACGGCATGACTTTTTCAAGAGTGC<br/> CATGCCCGAAGGTTATGTACAGGAAAGAAGTATATTTTTCAAAGATGACGGGAACATA<br/> AGACACGTGCTGAAGTCAAGTTTGAAGGTGATACCCTTGTTAATAGAATCGAGTTAAAA<br/> GGTATTGATTTTAAAGAAGATGGAAACATTCTTGGACACAAATTGGAATACAACATAA<br/> CTCACACAATGTATACATCATGGCAGACAAACAAAAGAATGGAATCAAAGTTAACTTCA<br/> AAATTAGACACAACATTGAAGATGGAAGCGTTCAACTAGCAGACCATTATCAACAAAA<br/> TACTCCAATTGGCGATGGCCCTGTCTTTTACCAGACAACCATTACCTGTCCACACAATC<br/> TGCCCTTCGAAAGATCCCAACGAAAAGAGAGACCACATGGTCCTTCTTGAGTTTGTA<br/> ACAGCTGCTGGGATTACACATGGCATGGATGAACTATACAA<b>ATAG</b></p>                                                                                                                                                                                                                                                                                                                                                                                                                                                                                                                                                                                                 |
| <p><i>lacZ</i> gene<br/>(Amplified from<br/><i>E. coli</i> MG1655<br/>by PCR)</p> | <p>(<i>EcoRI</i>)ggcttattccctaactaactaaagattaactttataaggaggaaaaacat<b>ATG</b>ACCATGATTACGGATTCACTG<br/> GCCGTCGTTTTACAACGTCGTGACTGGGAAAACCTGGCGTTACCCAACCTAATCGCCT<br/> TGCAGCACATCCCCCTTCGCCAGCTGGCGTAATAGCGAAGAGGCCCGCACCGATCGC<br/> CCTTCCAACAGTTGCGCAGCCTGAATGGCGAATGGCGCTTTGCTGTTTCCGGCACC<br/> AGAAGCGGTGCCGAAAGCTGGCTGGAGTGCATCTTCTGAGGCCGATACTGTGCTC<br/> GTCCCCCTCAAACCTGGCAGATGCACGGTTACGATGCGCCCATCTACACCAACGTGACCTA<br/> TCCCATTACGGTCAATCCGCCGTTTGTCCACGGAGAATCCGACGGGTTGTTACTCGC<br/> TCACATTAATGTTGATGAAAGCTGGCTACAGGAAGGCCAGACGCGAATATTTTTGAT<br/> GGCGTAACTCGGCGTTTTCATCTGTGGTGCAACGGGCGCTGGGTCGGTTACGGCCAGG<br/> ACAGTCGTTTGGCGTCTGAATTTGACCTGAGCGCATTTTTACGCGCCGGAGAAAACCG<br/> CCTCGCGGTGATGGTGTGCGCTGGAGTGACGGCAGTTATCTGGAAGATCAGGATATGT<br/> GGCGGATGAGCGGCATTTTCCGTGACGTCTCGTTGCTGCATAAACCGACTACACAAATC<br/> AGCGATTCCATGTTGCCACTCGCTTAAATGATGATTTACGCCGCGCTGTACTGGAGGCT<br/> GAAGTTCAGATGTGCGGCGAGTTGCGTGACTACCTACGGGTAACAGTTTCTTTATGGCA<br/> GGGTGAAACGCAGGTCGCCAGCGGCACCGCGCCTTTCGGCGGTGAAATATCGATGAG<br/> CGTGGTGGTTATGCCGATCGCGTCACTACTGCTGAACGTCGAAAACCCGAAACTGT<br/> GGAGCGCCGAAATCCCGAATCTCTATCGTGCGGTGGTTGAACTGCACACCGCCGACGG<br/> CACGCTGATTGAAGCAGAAGCCTGCGATGTCGGTTTCCGCGAGGTGCGGATTGAAAAT<br/> GGTCTGCTGCTGCTGAACGGCAAGCCGTTGCTGATTTCGAGGCGTTAACCGTCACGAGC<br/> ATCATCCTCTGCATGGTCAGGTCATGGATGAGCAGACGATGGTGCAGGATATCCTGCTG<br/> ATGAAGCAGAACAACCTTAAACGCCGTGCGCTGTTTCGCATTATCCGAACCATCCGCTGTG<br/> GTACACGCTGTGCGACCGCTACGGCCTGTATGTGGTGGATGAAGCCAATATTGAAACCC</p> |

|  |                                                                                                                                                                                                                                                                                                                                                                                                                                                                                                                                                                                                                                                                                                                                                                                                                                                                                                                                                                                                                                                                                                                                                                                                                                                                                                                                                                                                                                                                                                                                                                                                                                                                                                                                                                                                                                                                                                                                                                                                                                                                                          |
|--|------------------------------------------------------------------------------------------------------------------------------------------------------------------------------------------------------------------------------------------------------------------------------------------------------------------------------------------------------------------------------------------------------------------------------------------------------------------------------------------------------------------------------------------------------------------------------------------------------------------------------------------------------------------------------------------------------------------------------------------------------------------------------------------------------------------------------------------------------------------------------------------------------------------------------------------------------------------------------------------------------------------------------------------------------------------------------------------------------------------------------------------------------------------------------------------------------------------------------------------------------------------------------------------------------------------------------------------------------------------------------------------------------------------------------------------------------------------------------------------------------------------------------------------------------------------------------------------------------------------------------------------------------------------------------------------------------------------------------------------------------------------------------------------------------------------------------------------------------------------------------------------------------------------------------------------------------------------------------------------------------------------------------------------------------------------------------------------|
|  | <p> ACGGCATGGTGCCAATGAATCGTCTGACCGATGATCCGCGCTGGCTACCGGCGATGAGC<br/> GAACGCGTAACGCGAATGGTGCAGCGCGATCGTAATCACCCGAGTGTGATCATCTGGTC<br/> GCTGGGAATGAATCAGGCCACGGCGTAATCACGACGCGCTGTATCGCTGGATCAAAT<br/> CTGTCGATCCTTCCCGCCGGTGCAGTATGAAGGCGGGGAGCCGACACCACGGCCAC<br/> CGATATTATTTGCCCGATGTACGCGCGCTGGATGAAGACCAGCCCTCCCGGCTGTGC<br/> CGAAATGGTCCATCAAAAATGGCTTTCGCTACCTGGAGAGACGCGCCCGCTGATCCTT<br/> TGCGAATACGCCACGCGATGGGTAACAGTCTTGGCGTTTCGCTAAATACTGGCAGGC<br/> GTTTCGTCAGTATCCCGTTTACAGGGCGGCTTCGTCTGGGACTGGGTGGATCAGTCGC<br/> TGATTAATATGATGAAAACGGCAACCCGTGGTCGGCTTACGGCGGTGATTTTGGCGAT<br/> ACGCCGAACGATCGCCAGTTCTGTATGAACGGTCTGGTCTTTGCCGACCCGACGCCGC<br/> ATCCAGCGCTGACGGAAGCAAAACACCAGCAGCAGTTTTTCCAGTTCGGTTTATCCGG<br/> GCAAACCATCGAAGTGACCAGCGAATACCTGTTCCGTCATAGCGATAACGAGCTCCTGC<br/> ACTGGATGGTGGCGCTGGATGGTAAGCCGCTGGCAAGCGGTGAAGTGCCTCTGGATGT<br/> CGCTCCACAAGGTAAACAGTTGATTGAACTGCCTGAACTACCGCAGCCGGAGAGCGCC<br/> GGGCAACTCTGGCTCACAGTACGCGTAGTGCAACCGAACGCGACCCGATGGTCAGAA<br/> GCCGGGCACATCAGCGCCTGGCAGCAGTGGCGTCTGGCGGAAAACCTCAGTGTGACG<br/> CTCCCCGCCGCTCCACGCCATCCCGCATCTGACCACCAGCGAAATGGATTTTGCAT<br/> CGAGCTGGGTAATAAGCGTTGGCAATTTAACCGCCAGTCAGGCTTTCTTTACAGATGT<br/> GGATTGGCGATAAAAAACAACCTGCTGACGCCGCTGCGCGATCAGTTCACCCGTGCACC<br/> GCTGGATAACGACATTGGCGTAAGTGAAGCGACCCGCATTGACCTAACGCCTGGGTG<br/> GAACGCTGGAAGGCGGCGGGCCATTACCAGGCCGAAGCAGCGTTGTTGAGTGCACG<br/> GCAGATACACTTGCTGATGCGGTGCTGATTACGACCGCTCACGCGTGGCAGCATCAGG<br/> GGAAAACCTTATTATCAGCCGAAAACCTACCGGATTGATGGTAGTGGTCAAATGGCG<br/> ATTACCGTTGATGTTGAAGTGGCGAGCGATACACCGCATCCGGCGCGGATTGGCCTGAA<br/> CTGCCAGCTGGCGCAGGTAGCAGAGCGGGTAAACTGGCTCGGATTAGGGCCGCAAGA<br/> AACTATCCCGACCGCCTTACTGCCGCCTGTTTTGACCGCTGGGATCTGCCATTGTCAG<br/> ACATGTATACCCGTACGTCTTCCCGAGCGAAAACGGTCTGCGCTGCGGGACGCGCGA<br/> ATTGAATTATGGCCACACCAGTGGCGCGGCGACTTCCAGTTCAACATCAGCCGCTACA<br/> GTCAACAGCAACTGATGGAACCAGCCATCGCCATCTGCTGCACGCGGAAGAAGGCA<br/> CATGGCTGAATATCGACGGTTTCCATATGGGGATTGGTGGCGACGACTCCTGGAGCCCG<br/> TCAGTATCGGCGGAATCCAGCTGAGCGCCGGTCGCTACCATTACCAGTTGGTCTGGTG<br/> TCAAAAATAATAA(<i>Hpa</i>I) </p> |
|--|------------------------------------------------------------------------------------------------------------------------------------------------------------------------------------------------------------------------------------------------------------------------------------------------------------------------------------------------------------------------------------------------------------------------------------------------------------------------------------------------------------------------------------------------------------------------------------------------------------------------------------------------------------------------------------------------------------------------------------------------------------------------------------------------------------------------------------------------------------------------------------------------------------------------------------------------------------------------------------------------------------------------------------------------------------------------------------------------------------------------------------------------------------------------------------------------------------------------------------------------------------------------------------------------------------------------------------------------------------------------------------------------------------------------------------------------------------------------------------------------------------------------------------------------------------------------------------------------------------------------------------------------------------------------------------------------------------------------------------------------------------------------------------------------------------------------------------------------------------------------------------------------------------------------------------------------------------------------------------------------------------------------------------------------------------------------------------------|

Note: The parentheses before and after the gene indicate the gene or restriction endonuclease site directly connected to it; for the promoter, its characteristic sequence is indicated. The start and stop codons of the gene are marked in red.



**Table S3. Plasmid constructs used in this study**

| Plasmid                                     | Sequence differences of different arsenite-regulated promoters.                                                                                                        |
|---------------------------------------------|------------------------------------------------------------------------------------------------------------------------------------------------------------------------|
| P <sub>J109</sub> -P <sub>arsWT</sub>       | : CCTCTGCACTT <u>ACACATTCGTTAAGTCATATATGTTT</u> <u>TTGACTT</u> ATCCGCTTCGAA-GAGAGACACTACCTGCAACA <b>GAATTC</b>                                                         |
| P <sub>J109</sub> -P <sub>arsWT+24ABS</sub> | : CCTCTGCACTT <u>ACACATTCGTTAAGTCATATATGTTT</u> <u>TTGACTT</u> ATCCGCTTCGAA-GAGAGACACTACCTGCAACAA <u>TTAAGTCATATATGTTTTT</u> <u>GACTT</u> TCCGC <b>GAATTC</b>          |
| P <sub>J109</sub> -P <sub>arsWT+27ABS</sub> | : CCTCTGCACTT <u>ACACATTCGTTAAGTCATATATGTTT</u> <u>TTGACTT</u> ATCCGCTTCGAA-GAGAGACACTACCTGCAACAA <u>TCGTTAAGTCATATATGTTTTT</u> <u>GACTT</u> TCCGC <b>GAATTC</b>       |
| P <sub>J109</sub> -P <sub>arsWT+30ABS</sub> | : CCTCTGCACTT <u>ACACATTCGTTAAGTCATATATGTTT</u> <u>TTGACTT</u> ATCCGCTTCGAA-GAGAGACACTACCTGCAACAA <u>CATTCGTTAAGTCATATATGTTTTT</u> <u>GACTT</u> TCCGC <b>GAATTC</b>    |
| P <sub>J109</sub> -P <sub>arsWT+32ABS</sub> | : CCTCTGCACTT <u>ACACATTCGTTAAGTCATATATGTTT</u> <u>TTGACTT</u> ATCCGCTTCGAA-GAGAGACACTACCTGCAACAA <u>CACATTCGTTAAGTCATATATGTTTTT</u> <u>GACTT</u> TCCGC <b>GAATTC</b>  |
| P <sub>J109</sub> -P <sub>arsWT+33ABS</sub> | : CCTCTGCACTT <u>ACACATTCGTTAAGTCATATATGTTT</u> <u>TTGACTT</u> ATCCGCTTCGAA-GAGAGACACTACCTGCAACAA <u>ACACATTCGTTAAGTCATATATGTTTTT</u> <u>GACTT</u> TCCGC <b>GAATTC</b> |
| P <sub>J109</sub> -P <sub>arsO</sub>        | : CCTCTGCACTT <u>ACACATTCGTTAAGTCATA</u> <b>TATGTT</b> <u>TTTGACTT</u> ATCCGCTTCGAA- <b>GAATTC</b>                                                                     |
| P <sub>J109</sub> -P <sub>arsOA1</sub>      | : CCTCTGCA <b>TTT</b> <u>ACACATTCGTTAAGTCATA</u> <b>TATGTT</b> <u>TTTGACTT</u> ATCCGCTTCGAA- <b>GAATTC</b>                                                             |
| P <sub>J109</sub> -P <sub>arsOB1</sub>      | : CCTCTGCT <b>TTTACA</b> <u>ACATTCGTTAAGTCATA</u> <b>TATGTT</b> <u>TTTGACTT</u> ATCCGCTTCGAA- <b>GAATTC</b>                                                            |
| P <sub>J109</sub> -P <sub>arsOB2</sub>      | : CCTCTGCT <b>TTTACC</b> <u>ACATTCGTTAAGTCATA</u> <b>TATGTT</b> <u>TTTGACTT</u> ATCCGCTTCGAA- <b>GAATTC</b>                                                            |
| P <sub>J109</sub> -P <sub>arsOB3</sub>      | : CCTCTGCT <b>TTTAA</b> <u>ACATTCGTTAAGTCATA</u> <b>TATGTT</b> <u>TTTGACTT</u> ATCCGCTTCGAA- <b>GAATTC</b>                                                             |
| P <sub>J109</sub> -P <sub>arsOB4</sub>      | : CCTCTGCT <b>TTGT</b> <u>ACATTCGTTAAGTCATA</u> <b>TATGTT</b> <u>TTTGACTT</u> ATCCGCTTCGAA- <b>GAATTC</b>                                                              |
| P <sub>J109</sub> -P <sub>arsOB5</sub>      | : CCTCTGCT <b>TTTT</b> <u>ACATTCGTTAAGTCATA</u> <b>TATGTT</b> <u>TTTGACTT</u> ATCCGCTTCGAA- <b>GAATTC</b>                                                              |
| P <sub>J109</sub> -P <sub>arsOC1</sub>      | : CCTCTG <b>TTTACA</b> <u>ACATTCGTTAAGTCATA</u> <b>TATGTT</b> <u>TTTGACTT</u> ATCCGCTTCGAA- <b>GAATTC</b>                                                              |
| P <sub>J109</sub> -P <sub>arsOC2</sub>      | : CCTCTG <b>TTGAC</b> <u>ACATTCGTTAAGTCATA</u> <b>TATGTT</b> <u>TTTGACTT</u> ATCCGCTTCGAA- <b>GAATTC</b>                                                               |
| P <sub>J109</sub> -P <sub>arsOC3</sub>      | : CCTCTG <b>TTGACT</b> <u>CATTCGTTAAGTCATA</u> <b>TATGTT</b> <u>TTTGACTT</u> ATCCGCTTCGAA- <b>GAATTC</b>                                                               |
| P <sub>J109</sub> -P <sub>arsOD1</sub>      | : CCTCT <b>TTTACA</b> <u>ACATTCGTTAAGTCATA</u> <b>TATGTT</b> <u>TTTGACTT</u> ATCCGCTTCGAA- <b>GAATTC</b>                                                               |
| P <sub>J109</sub> -P <sub>arsOE1</sub>      | : CCTCT <b>TTTACAT</b> <u>ACATTCGTTAAGTCATA</u> <b>TATGTT</b> <u>TTTGACTT</u> ATCCGCTTCGAA- <b>GAATTC</b>                                                              |
| P <sub>J109</sub> -P <sub>arsOE2</sub>      | : CCTCT <b>TTGACAT</b> <u>ACATTCGTTAAGTCATA</u> <b>TATGTT</b> <u>TTTGACTT</u> ATCCGCTTCGAA- <b>GAATTC</b>                                                              |

|                                             |                                                                                                                                            |
|---------------------------------------------|--------------------------------------------------------------------------------------------------------------------------------------------|
| P <sub>J109</sub> -P <sub>arsOF1</sub>      | : CCT <b>TTTAC</b> ATT <u>ACACATTCGTTAAGTCATA</u> <b>TATGTT</b> <u>TTTGACTT</u> ATCCGCTTCGAA-<br><b>GAATTC</b>                             |
| P <sub>J109</sub> -P <sub>arsOG1</sub>      | : CCT <b>TTTAC</b> ACTT <u>ACACATTCGTTAAGTCATA</u> <b>TATGTT</b> <u>TTTGACTT</u> ATCCGCTTCGAA-<br><b>GAATTC</b>                            |
| P <sub>J109</sub> -P <sub>arsOH1</sub>      | : <b>CTTTACA</b> ACTT <u>ACACATTCGTTAAGTCATA</u> <b>TATGTT</b> <u>TTTGACTT</u> ATCCGCTTCGAA-<br><b>GAATTC</b>                              |
| Plasmid                                     | Description                                                                                                                                |
| P <sub>lacV</sub> -P <sub>arsWT</sub>       | pPROBE-TT carrying P <sub>lacV</sub> -RBS <sub>arsR</sub> -arsR-P <sub>arsWT</sub> in between <i>Hind</i> III and <i>Eco</i> RI sites      |
| P <sub>lacV</sub> -P <sub>arsOB4</sub>      | pPROBE-TT carrying P <sub>lacV</sub> -RBS <sub>arsR</sub> -arsR-P <sub>arsOB4</sub> in between <i>Hind</i> III and <i>Eco</i> RI sites     |
| P <sub>lacV</sub> -P <sub>arsOC2</sub>      | pPROBE-TT carrying P <sub>lacV</sub> -RBS <sub>arsR</sub> -arsR-P <sub>arsOC2</sub> in between <i>Hind</i> III and <i>Eco</i> RI sites     |
| P <sub>lacV</sub> -P <sub>arsWT-lacZ</sub>  | pPROBE-TT carrying P <sub>lacV</sub> -RBS <sub>arsR</sub> -arsR-P <sub>arsWT-lacZ</sub> in between <i>Hind</i> III and <i>Hpa</i> I sites  |
| P <sub>lacV</sub> -P <sub>arsOB4-lacZ</sub> | pPROBE-TT carrying P <sub>lacV</sub> -RBS <sub>arsR</sub> -arsR-P <sub>arsOB4-lacZ</sub> in between <i>Hind</i> III and <i>Hpa</i> I sites |
| P <sub>lacV</sub> -P <sub>arsOC2-lacZ</sub> | pPROBE-TT carrying P <sub>lacV</sub> -RBS <sub>arsR</sub> -arsR-P <sub>arsOC2-lacZ</sub> in between <i>Hind</i> III and <i>Hpa</i> I sites |

Note: P<sub>J109</sub>-P<sub>arsXX</sub> (XX means a different name) is the abbreviation of p-TT-P<sub>J109</sub>-r30arsR-P<sub>arsXX</sub>. The plasmids shown in sequence illustrate that their arsenic-regulated promoter sequences are different. The bolded sequence represents the original -10 and -35 positions of the wild-type promoter, and the bolded and italicized sequence represents the restriction endonuclease site *Eco*RI. The ArsR binding site is shown in underlined blue font, and the potential -10 site and the reconstructed -35 site are shown in bold red.

**Table S4. RNAP binding site library contains eighteen -35 sites and thirty-six -10 sites**

|   | -35 site              |                     | -10 site              |                     |                     |                     |
|---|-----------------------|---------------------|-----------------------|---------------------|---------------------|---------------------|
| 1 | TTGACA <sup>3</sup>   | CTTAGA <sup>4</sup> | TATAAT <sup>3,4</sup> | GATAAC <sup>4</sup> | TACAAT*             | ACAATG <sup>5</sup> |
| 2 | TAGACA <sup>3</sup>   | ATCTGA <sup>6</sup> | TATAGT <sup>3</sup>   | GTAAAA <sup>4</sup> | GACTAT*             | TAGGAT <sup>5</sup> |
| 3 | TTTACA <sup>3,4</sup> | TAGACT <sup>6</sup> | GATAAT <sup>3</sup>   | GTTGTA <sup>4</sup> | TAGGCT <sup>5</sup> | GTATGT <sup>7</sup> |
| 4 | TTGTGA <sup>3</sup>   | TTTATA*             | GATACT <sup>3</sup>   | ATATTA <sup>6</sup> | TAATAT <sup>5</sup> | TATATA <sup>7</sup> |
| 5 | CTGACA <sup>3</sup>   | TTTACG*             | TAAATT <sup>3</sup>   | TACAGT*             | TATGAT <sup>5</sup> | TATCGT <sup>7</sup> |
| 6 | TTTACC <sup>4</sup>   | GCGGTG <sup>5</sup> | TACTGT <sup>3</sup>   | TATTAT*             | GTATCT <sup>5</sup> | AGGTG <sup>7</sup>  |
| 7 | ATTACA <sup>4</sup>   | TTGATG <sup>5</sup> | TATGTT <sup>3,4</sup> | GATTAT*             | GAGGAT <sup>5</sup> | TAGGTT <sup>7</sup> |
| 8 | TTAAGA <sup>4</sup>   | TTGCAA              | AATAAT <sup>4</sup>   | TATTGT*             | GATGAT <sup>5</sup> | TTTAAT <sup>7</sup> |
| 9 | CTCAGA <sup>4</sup>   | TTGACG <sup>7</sup> | GACACT <sup>8</sup>   | TACTAT*             | TAAAAT <sup>5</sup> | TTAGTA <sup>7</sup> |

\*Promoters/Catalog/Anderson - parts.igem.org

**Table S5. Best fits for the characterized responses of the arsenic sensors with diverse promoters**

| Expression of ArsR | Promoter            | Leaky <sup>a</sup> | $k^b$<br>(Fluo/OD <sub>600</sub> ) | $Km^c$ /LOD <sup>d</sup><br>(ppb) | $R^2$  | Fold change at various conc. (ppb) |      |       |        |        |
|--------------------|---------------------|--------------------|------------------------------------|-----------------------------------|--------|------------------------------------|------|-------|--------|--------|
|                    |                     |                    |                                    |                                   |        | 0.29                               | 1.17 | 9.38  | 75     | 300    |
| P <sub>J109</sub>  | P <sub>arsWT</sub>  | 387.71             | 9798.30                            | 17.46/0.18                        | 0.9837 | 1.12                               | 1.59 | 9.39  | 20.24  | 25.27  |
|                    | P <sub>arsOB4</sub> | 84.75              | 6184.69                            | 18.48/0.27                        | 0.9836 | 1.20                               | 2.28 | 24.16 | 58.43  | 73.21  |
|                    | P <sub>arsOC2</sub> | 319.66             | 16133.81                           | 14.23/0.21                        | 0.9899 | 1.25                               | 2.38 | 21.12 | 43.04  | 50.54  |
| P <sub>lacV</sub>  | P <sub>arsWT</sub>  | 221.11             | 9065.22                            | 21.84/0.21                        | 0.9868 | 1.08                               | 1.79 | 13.66 | 32.67  | 41.04  |
|                    | P <sub>arsOB4</sub> | 40.13              | 5889.15                            | 22.10/0.31                        | 0.9870 | 1.09                               | 3.04 | 45.11 | 116.04 | 148.11 |
|                    | P <sub>arsOC2</sub> | 92.39              | 16942.84                           | 18.40/0.24                        | 0.9884 | 1.25                               | 3.90 | 63.80 | 147.93 | 183.52 |

<sup>a</sup> Leaky: Basal expression in the absence of inducers.

<sup>b</sup>  $k$ : Maximum expression level in 300 ppb arsenic.

<sup>c</sup>  $Km$ : Inducer concentration achieving half-maximal activation.

<sup>d</sup> LOD: LOD stands for limit of detection and is the lowest analyte concentration that can probably be reliably distinguished from the basal signal.

**Table S6. Accuracy and reliability of the constructed biosensors for real samples**

| Sample     | AFS<br>(ppb) | Final As<br>(ppb) | 255 – R <sup>a</sup><br>(Dilution factor) | Estimated<br>(ppb) | Recover |
|------------|--------------|-------------------|-------------------------------------------|--------------------|---------|
| G-Sample 1 | 20.7         | 20.7              | 129 (6)                                   | 17.82              | 86.08%  |
| G-Sample 2 |              | 50.7              | 148 (10)                                  | 45.88              | 90.49%  |
| G-Sample 2 |              | 80.7              | 137.33 (20)                               | 76.07              | 94.26%  |

<sup>a</sup>Mean 255 – R value (n = 3).

**Table S7. Comparison of previously reported arsenic sensors with this study**

| Microbial chassis<br>Biosensor                                        | LOD<br>(ppb) <sup>a</sup> | Linear or input<br>range (ppb) <sup>b</sup> | Description, reference                                                                                            |
|-----------------------------------------------------------------------|---------------------------|---------------------------------------------|-------------------------------------------------------------------------------------------------------------------|
| <b><i>gfp</i> reporter</b>                                            |                           |                                             |                                                                                                                   |
| <i>E. coli</i> DH5 $\alpha$<br>P <sub>lacV</sub> -P <sub>arsOC2</sub> | 0.24                      | 2.34-150                                    | This study                                                                                                        |
| <i>E. coli</i> DH5 $\alpha$<br>pPR-arsR-ABS                           | 7.5                       | 7.5-75                                      | Gray value analysis, <i>ars</i> operon from R773 plasmid of <i>E. coli</i> . <sup>9</sup>                         |
| <i>E. coli</i> DH5 $\alpha$<br>pVLAS1                                 | 7.5                       | 37.5-450                                    | Non-specificity, high background noise, <i>ars</i> operon from pI258 plasmid of <i>S. aureus</i> . <sup>10</sup>  |
| <i>E. coli</i> DH5 $\alpha$<br>pUC18-ep3ars-gfp                       | 0.75                      | 1-50                                        | Flow cytometry analysis, directed evolution <i>ars</i> operon, <i>ars</i> operon from pPR-arsR-ABS. <sup>11</sup> |
| <i>E. coli</i> K-12                                                   | 5                         | 5-140                                       | With a T7 RNAP amplifier, <i>ars</i> operon from <i>E.</i>                                                        |

|                                                 |      |          |                                                                                                                         |
|-------------------------------------------------|------|----------|-------------------------------------------------------------------------------------------------------------------------|
| POLA                                            |      |          | <i>coli</i> genome. <sup>12</sup>                                                                                       |
| <i>E. coli</i> TOP10                            | 0.75 | 2.3-7.5  | Low fold changes, narrow response range. <i>ars</i> operon from <i>G. sulfurreducens</i> genome. <sup>13</sup>          |
| pAsS                                            |      |          |                                                                                                                         |
| Cell-free                                       | 3.65 | 4-50     | Cell-free expression, fast response, <i>ars</i> operon from pUC18-ep3ars-gfp. <sup>14</sup>                             |
| ep3-gfp                                         |      |          |                                                                                                                         |
| <b>lacZ reporter</b>                            |      |          |                                                                                                                         |
| <i>E. coli</i> DH5 $\alpha$                     | 0.39 | 1-5      | This study                                                                                                              |
| <i>P<sub>lacV</sub>-P<sub>arsOC2</sub>-lacZ</i> |      |          |                                                                                                                         |
| <i>E. coli</i>                                  | 8    | 8-78     | Semi-quantitative analysis, <i>ars</i> operon from R773 plasmid of <i>E. coli</i> . <sup>9</sup>                        |
| pMV-arsR-ABS                                    |      |          |                                                                                                                         |
| <i>E. coli</i> JM109                            | 5    | 5-20     | Output pH change, <i>ars</i> operon from <i>E. coli</i> genome. <sup>15</sup>                                           |
| Pars/arsR-lacZ                                  |      |          |                                                                                                                         |
| <i>B. subtilis</i>                              | 7.5  | 7.5-7500 | Coupled enzyme reaction for luminescence, <i>ars</i> operon from <i>B. subtilis</i> . <sup>16</sup>                     |
| ars-23                                          |      |          |                                                                                                                         |
| <i>E. coli</i> DH5 $\alpha$                     | 0.8  | 3.75-30  | Electrochemical read-out, contain pPR-arsR-ABS-RBS-lacZ, with RBS optimal. <sup>17</sup>                                |
| strain 2245                                     |      |          |                                                                                                                         |
| <i>E. coli</i> DH5 $\alpha$                     | 10   | 10-500   | High background, <i>E. coli</i> DH5 $\alpha$ , <i>ars</i> operon from pI258 plasmid of <i>S. aureus</i> . <sup>18</sup> |
| pAs-lacZ                                        |      |          |                                                                                                                         |

<sup>a</sup> The LOD indicated in the paper, or the lowest concentration actually used.

<sup>b</sup> The linear range concentration indicated in the paper, or the actual concentration range used.

## References

- Weel-Sneve, R.; Kristiansen, K. I.; Odsbu, I.; Dalhus, B.; Booth, J.; Rognes, T.; Skarstad, K.; Bjoras, M., Single transmembrane peptide DinQ modulates membrane-dependent activities. *PLoS Genet* **2013**, *9* (2), e1003260.
- Chun Xu, W. S., and Barry P. Rosen, The Chromosomal *arsR* Gene of *Escherichia coli* Encodes a trans-acting Metalloregulatory Protein. *J Biol Chem* **1996**, *271* (5), 2427–2432.
- Chen, Y.; Ho, J. M. L.; Shis, D. L.; Gupta, C.; Long, J.; Wagner, D. S.; Ott, W.; Josic, K.; Bennett, M. R., Tuning the dynamic range of bacterial promoters regulated by ligand-inducible transcription factors. *Nat Commun* **2018**, *9* (1), 64.
- Brewster, R. C.; Jones, D. L.; Phillips, R., Tuning promoter strength through RNA polymerase binding site design in *Escherichia coli*. *PLoS Comput Biol* **2012**, *8* (12), e1002811.
- Davis, J. H.; Rubin, A. J.; Sauer, R. T., Design, construction and characterization of a set of insulated bacterial promoters. *Nucleic Acids Res* **2011**, *39* (3), 1131-41.
- Cox, R. S., 3rd; Surette, M. G.; Elowitz, M. B., Programming gene expression with combinatorial promoters. *Mol Syst Biol* **2007**, *3*, 145.
- Stanton, B. C.; Nielsen, A. A.; Tamsir, A.; Clancy, K.; Peterson, T.; Voigt, C. A., Genomic mining of prokaryotic repressors for orthogonal logic gates. *Nat Chem Biol* **2014**, *10* (2), 99-105.
- Chen, S. Y.; Wei, W.; Yin, B. C.; Tong, Y.; Lu, J.; Ye, B. C., Development of a Highly Sensitive Whole-Cell Biosensor for Arsenite Detection through Engineered Promoter Modifications. *ACS Synth Biol* **2019**, *8* (10), 2295-2302.
- Stocker, J.; Balluch, D.; Gsell, M.; Harms, H.; Feliciano, J.; Da Unert, S.; Malik, K. A.; Roelof, Development of a set of simple bacterial biosensors for quantitative and rapid measurements of arsenite and arsenate in potable water.

*Environ Sci Technol* **2003**, *37* (20), 4743-4750.

10. Liao, V. H.; Ou, K., Development and testing of a green fluorescent protein-based bacterial biosensor for measuring bioavailable arsenic in contaminated groundwater samples. *Environ Toxicol Chem* **2005**, *24*.

11. Li, L.; Liang, J.; Hong, W.; Zhao, Y.; Sun, S.; Yang, X.; Xu, A.; Hang, H.; Wu, L.; Chen, S., Evolved bacterial biosensor for arsenite detection in environmental water. *Environ Sci Technol* **2015**, *49* (10), 6149-55.

12. Pola-López, L. A.; Camas-Anzuetto, J. L.; Martínez-Antonio, A.; Luján-Hidalgo, M. C.; Anzuetto-Sánchez, G.; Ruíz-Valdiviezo, V. M.; Grajales-Coutiño, R.; González, J. H. C., Novel arsenic biosensor "POLA" obtained by a genetically modified *E. coli* bioreporter cell. *Sensor Actuat B-Chem* **2018**, *254*, 1061-1068.

13. Li, P.; Wang, Y.; Yuan, X.; Liu, X.; Liu, C.; Fu, X.; Sun, D.; Dang, Y.; Holmes, D. E., Development of a whole-cell biosensor based on an ArsR-P regulatory circuit from *Geobacter sulfurreducens*. *Environ Sci and Ecotechnol* **2021**, *6*.

14. Wang, X.; Zhu, K.; Chen, D.; Wang, J.; Wang, X.; Xu, A.; Wu, L.; Li, L.; Chen, S., Monitoring arsenic using genetically encoded biosensors in vitro: The role of evolved regulatory genes. *Ecotoxicol Environ Saf* **2021**, *207*, 111273.

15. Aleksic, J.; de Mora, K.; Millar, A.; Davidson, B.; Kozma-Bognar, L.; Ma, H.; French, C.; Bizzari, F.; Elfick, A.; Wilson, J.; Cai, Y.; Seshasayee, S. L.; Nicholson, J.; Ivakhno, S., Development of a novel biosensor for the detection of arsenic in drinking water. *IET Synthetic Biology* **2007**, *1* (1), 87-90.

16. Date, A.; Pasini, P.; Sangal, A.; Daunert, S., Packaging Sensing Cells in Spores for Long-Term Preservation of Sensors: A Tool for Biomedical and Environmental Analysis. *Anal Chem* **2010**, *82* (14), 6098-6103.

17. Cortes-Salazar, F.; Beggah, S.; van der Meer, J. R.; Girault, H. H., Electrochemical As(III) whole-cell based biochip sensor. *Biosens Bioelectron* **2013**, *47*, 237-42.

18. Huang, C. W.; Wei, C. C.; Liao, V. H., A low cost color-based bacterial biosensor for measuring arsenic in groundwater. *Chemosphere* **2015**, *141*, 44-9.
